# Supplementary material for: Glycolate combats massive oxidative stress by restoring redox potential in Caenorhabditis elegans
Source: PubMed Central journal article supplement (PMC7851149; doi:10.1038/s42003-021-01669-2), 2021-02-01
Supplement: 42003_2021_1669_MOESM2_ESM.pdf [file 42003_2021_1669_MOESM2_ESM.pdf]

## Supplementary Information

# **Glycolate combats massive oxidative stress by restoring redox potential in *Caenorhabditis elegans***

Veronica Diez<sup>1</sup>, Sofia Traikov<sup>1</sup>, Kathrin Schmeisser<sup>1</sup>, Akshay K. Das Adhikari<sup>1</sup> and  
Teymuraz V. Kurzchalia<sup>1\*</sup>

<sup>1</sup> Max Planck Institute of Molecular Cell Biology and Genetics, Dresden, Germany

\* Correspondence to: [kurzchalia@mpi-cbg.de](mailto:kurzchalia@mpi-cbg.de)

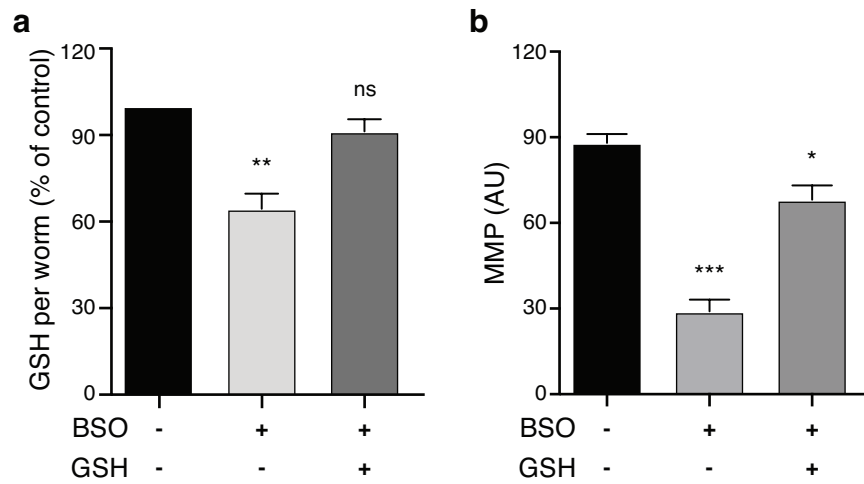

**Supplementary Figure 1. BSO and GSH supplementation have opposite effects on relative amounts of GSH and MMP.** Levels of GSH (a) and mitochondrial membrane potential (MMP) (b) were quantified after 2 days of incubation at 15°C from L1 stage with or without 0.5 mM BSO and 1mM GSH. Error bars represent standard error of the mean ( $n = 3$ ).

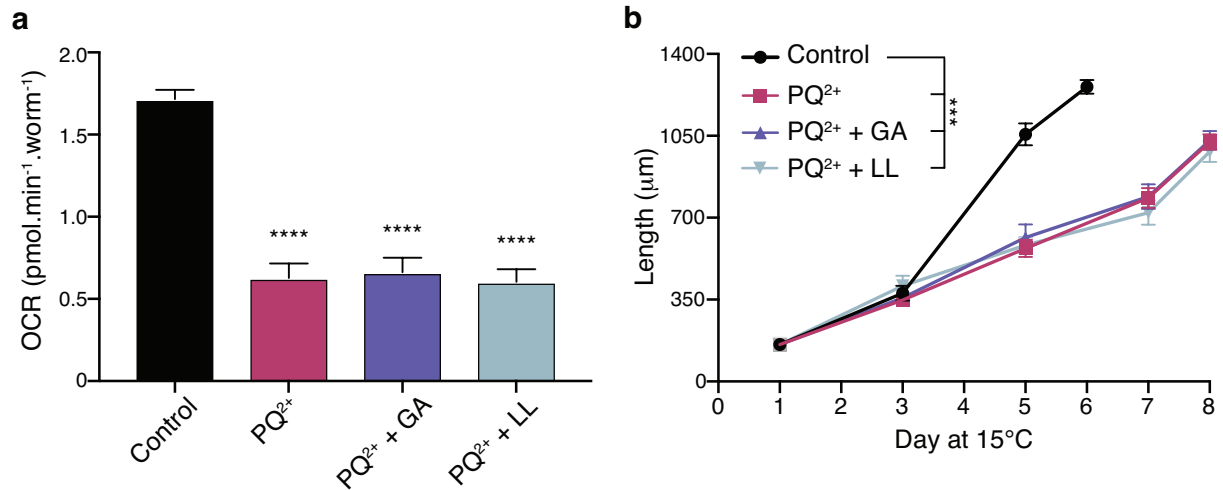

**Supplementary Figure 2. Glycolate cannot rescue respiration and developmental rates of PQ<sup>2+</sup>-exposed animals.** a) Respiration rates in terms of oxygen consumption rate (OCR) determined after 2 days of incubation at 15°C from L1 stage with or without PQ<sup>2+</sup>, GA and L-lactate. OCR was calculated using a Seahorse Analyzer and normalized to number of worms. b) Growth curves of worms incubated under the same conditions as in (a). The lengths of at least 20 animals per condition were determined every day and averaged for each experiment. Error bars represent standard error of the mean ( $n = 5$ ). 200  $\mu$ M PQ<sup>2+</sup>, 10mM glycolate (GA), 10mM L-lactate (LL).

Score = 116 bits (290), Expect = 2e-26, Method: Compositional matrix adjust.  
Identities = 75/238 (31%), Positives = 120/238 (50%), Gaps = 9/238 (3%)

```
GRHPR_HUMAN 63 VDKRILDAAGANLKVISTMSVGIDHLALDEIKKRGIKRVGYTPDVLTDTTAELAVSLLLT 122
+ +L A+ LK++ G+D++ + I V TP + + AEL +L+L+
C31C9.2_CELE 58 ITAELLAASAGKLLVGRAGTGVNDNIDVPAASANKILVMNTPQANSRSAAELTCTLI 117

GRHPR_HUMAN 123 CRRLEPAIEEVKNGGWTSWKPLWLCGYGLTQSTVGIIGLGRIGQAIARRLKPF 182
R +P+A +K G W + YG T+ ++GLGRIG +A RL+ FG++
C31C9.2_CELE 118 SRHVPQAAASMKAGKWARDFMGEEVYG---RTLAVLGLGRIGSEVAVRLQAF 171

GRHPR_HUMAN 183 TGRQPR--PEEAAEFQAEFVSTPELAAQSDFIVVACSLTPATEGLCNKDF 240
G P E+A E +S ++ Q+D+I V L TE L NK+ K K+
C31C9.2_CELE 172 IGFDPMTKEQAEAKNIELLSLEQIWPQADYITVHVPLIKQTENLINKETLAK 231

GRHPR_HUMAN 241 INISRGDVVNQDDLYQALASGKIAAAGLDVTSPEPLPTNHPLLT 298
IN++RG +VN+ DL ++L +G A DV EP PT L+ + PH+G++T
C31C9.2_CELE 232 INVARGGIVNEVDLVEISLNAGHAKGAADFVFEQEP-PTFRE 288
```

**Supplementary Figure 3. Sequence alignment between the human Glyoxylate Reductase /Hydroxypyruvate reductase (GRHPR\_HUMAN) and the protein sequence corresponding to C31C9.2 from *C. elegans* (C31C9.2\_CELE). The alignment was carried out using the Blast tool from wormbase.org.**

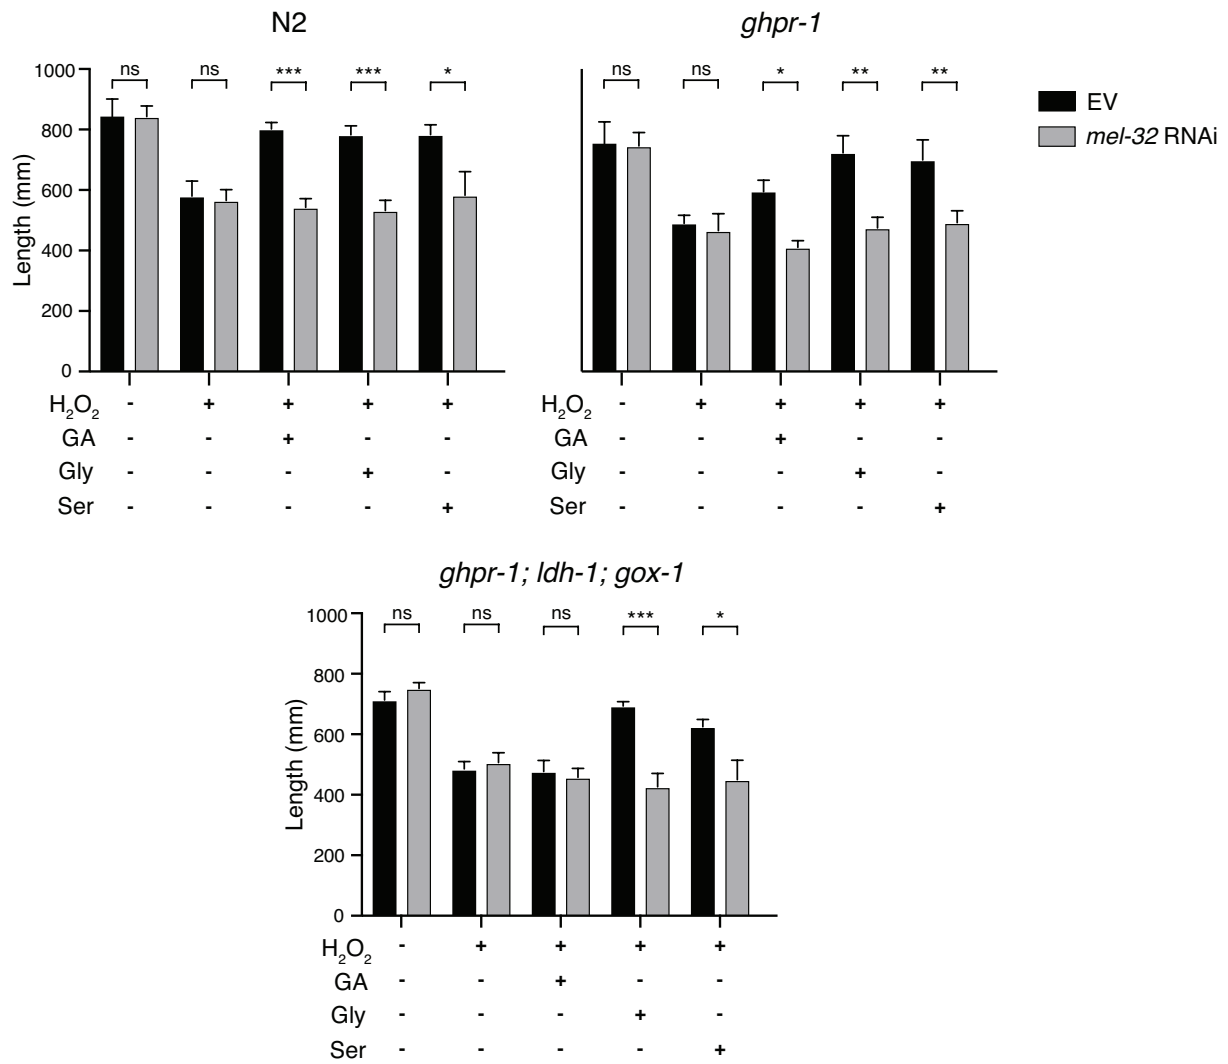

**Supplementary Figure 4. Restoration of developmental rate by glycine and L-serine in mutants unable to metabolize glycolate to glyoxylate is lost upon inactivation of SHMT.** Size of N2, *ghpr-1* and *ghpr-1, ldh-1, gox-1* worms fed with empty vector (EV) or RNAi bacteria against *mel-32*. Animals were incubated at 15°C from L1 stage for 4 days with or without 100 mM H<sub>2</sub>O<sub>2</sub> together with 10 mM glycolate (GA), 100 μM glycine or 500 μM L-serine. The lengths of at least 20 animals per condition were determined and averaged for each experiment. Error bars represent standard error of the mean ( $n = 3$ ).

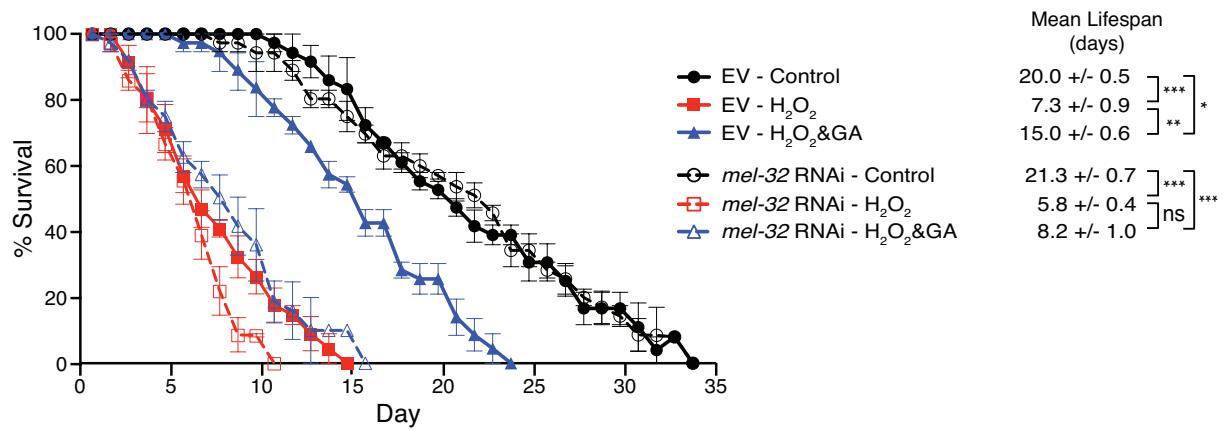

**Supplementary Figure 5. Glycolate-mediated rescue of lifespan is lost in *mel-32* knockdown worms.** Lifespan analysis without FUdR of N2 worms that had been exposed to H<sub>2</sub>O<sub>2</sub> and 10mM GA, as indicated, during larval development and that were fed with empty vector (EV) or *mel-32* RNAi bacteria all along the growth curve. Error bars represent standard error of the mean ( $n = 3$ ).

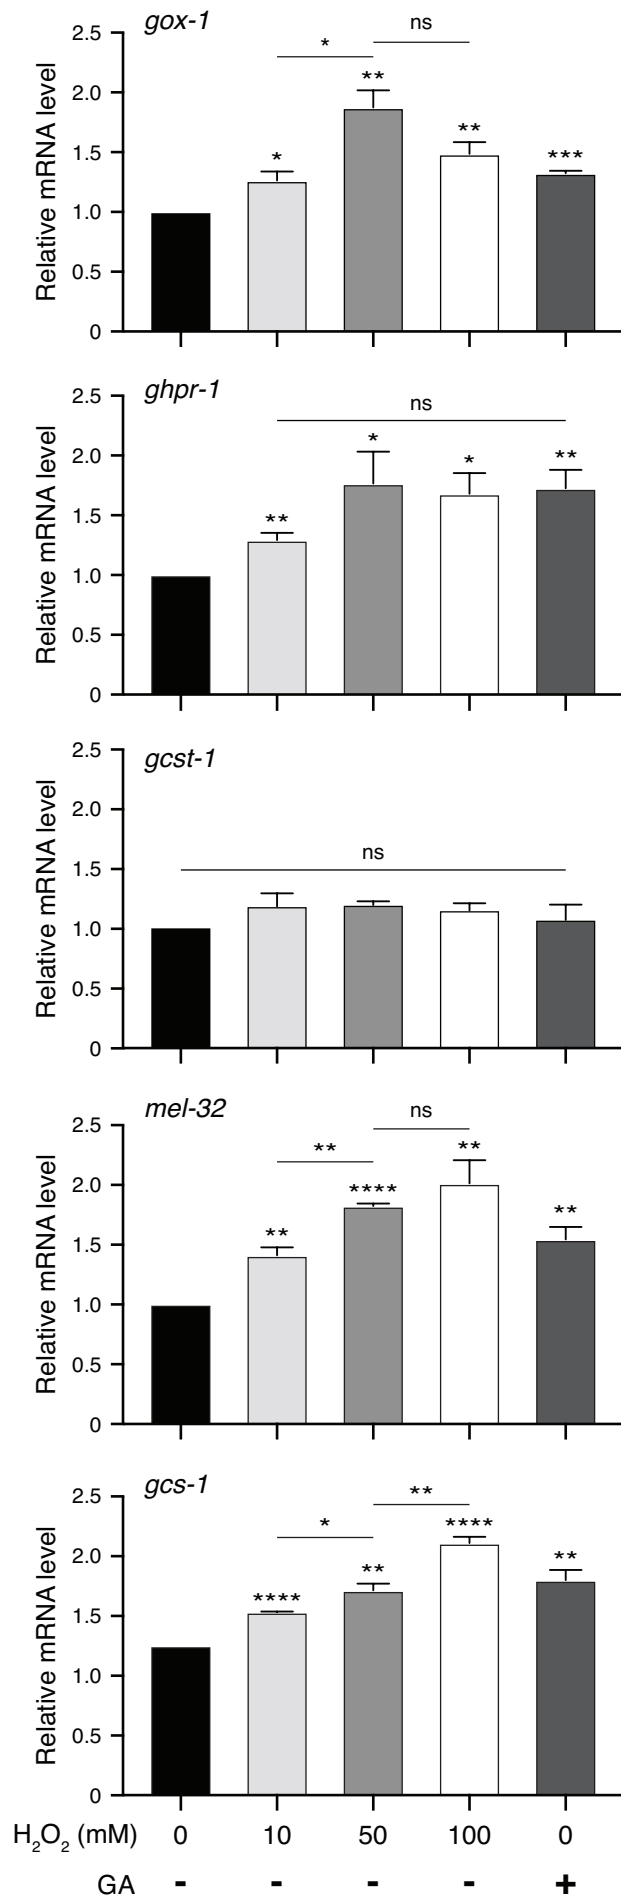

**Supplementary Figure 6. H<sub>2</sub>O<sub>2</sub> and glycolate induce the expression of glycolate metabolism-associated genes.** Relative mRNA expression levels of *gox-1*, *ghpr-1*, *gcst-1*, *mel-32* and *gcs-1* were detected by reverse-transcription quantitative polymerase chain reaction. Animals were incubated at 15°C from L1 stage for 3 days with or without H<sub>2</sub>O<sub>2</sub> or 10 mM glycolate (GA). Error bars represent standard error of the mean ( $n = 3$ ). from worms incubated under different conditions as indicated from L1.



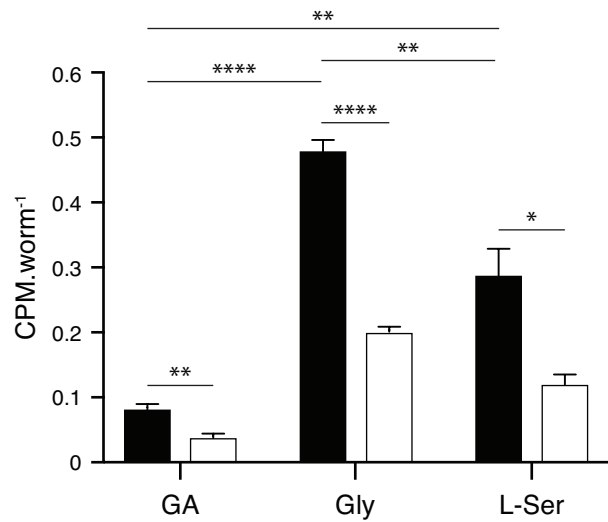

**Supplementary Figure 7. Glycine and L-serine uptake by N2 worms are higher than glycolate.** Animals were incubated at 15°C from L1 stage for 3 days with (white bars) or without 100 mM H<sub>2</sub>O<sub>2</sub> (black bars) together with 10 μCi [1-<sup>14</sup>C]-glycolate, [1-<sup>14</sup>C]-glycine or L-[1-<sup>14</sup>C]-serine. Error bars represent standard error of the mean ( $n = 3$ ).
