# Supplementary material for: Glycolate combats massive oxidative stress by restoring redox potential in Caenorhabditis elegans
Source: PubMed Central journal article supplement (PMC7851149; doi:10.1038/s42003-021-01669-2), 2021-02-01
Supplement: 42003_2021_1669_MOESM3_ESM.pdf [file 42003_2021_1669_MOESM3_ESM.pdf]

## Description of Additional Supplementary Files

**File name:** Supplementary Data 1

**Description:** Source data underlying plots shown in figures.
